# Supplementary material
Source: MDPI journal article supplement (https://www.mdpi.com/1424-2818/15/1/64)

## Supplemental Information for:

Another chapter in the history of the European invasion by the Western conifer seed bug,  
*Leptoglossus occidentalis*: the Iberian Peninsula

Farinha A, Branco M, Courtin C, Lesieur V, Gallego D, Sanchez-Garcia F.J., Sousa E., Roques A,  
Auger-Rozenberg M-A\*, and Bras A\*

\*Contributed equally to this work.

Table S1. Results of the hierarchical Analysis of molecular variance (AMOVA) of *Leptoglossus occidentalis* invasive populations in western Europe computed with mtDNA sequence data from this study and Lesieur et al. (2019).

| Source of variation             | df | Sum of squares | % of variation | Fixation index                             |
|---------------------------------|----|----------------|----------------|--------------------------------------------|
| (a) Geographic proximity        |    |                |                |                                            |
| Among groups                    | 1  | 1.833          | 8.90           | $F_{CT} = 0.089$ ( <i>p.value</i> : 0.059) |
| Among populations within groups | 18 | 8.442          | 13.39          | $F_{SC} = 0.147$ ( <i>p.value</i> : 0.006) |
| Within populations              | 76 | 19.714         | 77.71          | $F_{ST} = 0.223$ ( <i>p.value</i> : 0.001) |
| (b) First observation           |    |                |                |                                            |
| Among groups                    | 2  | 2.061          | 4.86           | $F_{CT} = 0.049$ ( <i>p.value</i> : 0.155) |
| Among populations within groups | 17 | 8.214          | 14.99          | $F_{SC} = 0.158$ ( <i>p.value</i> : 0.005) |
| Within populations              | 76 | 19.714         | 80.15          | $F_{ST} = 0.198$ ( <i>p.value</i> : 0.001) |

Statistical probabilities were derived from 50,175 permutations. (a) two groups: (1) Alessandria, Yvoy-le-Marron, Lavercantière, Serre-Ponçon, Barcelona, Lleida, Soria; (2) Valladolid, Salamanca, Segovia, Murcia, Burgos, Galicia, Coruche, Valencia, Faro, Huelva, Islas Cies, Almeria, Aveiro ; (b) three groups: (1) Alessandria, Lavercantière, Serre-Ponçon, Barcelona; (2) Yvoy-le-Marron, Lleida, Soria, Valladolid, Salamanca, Segovia, Almeria; (3) Murcia, Burgos, Galicia, Coruche, Valencia, Faro, Huelva, Islas Cies, Aveiro.

Figure S1. Correlations between the pairwise  $F_{ST}$  values and pairwise geographical distances (in km) for invasive populations ( $R^2$ : 0.009) of *Leptoglossus occidentalis*.

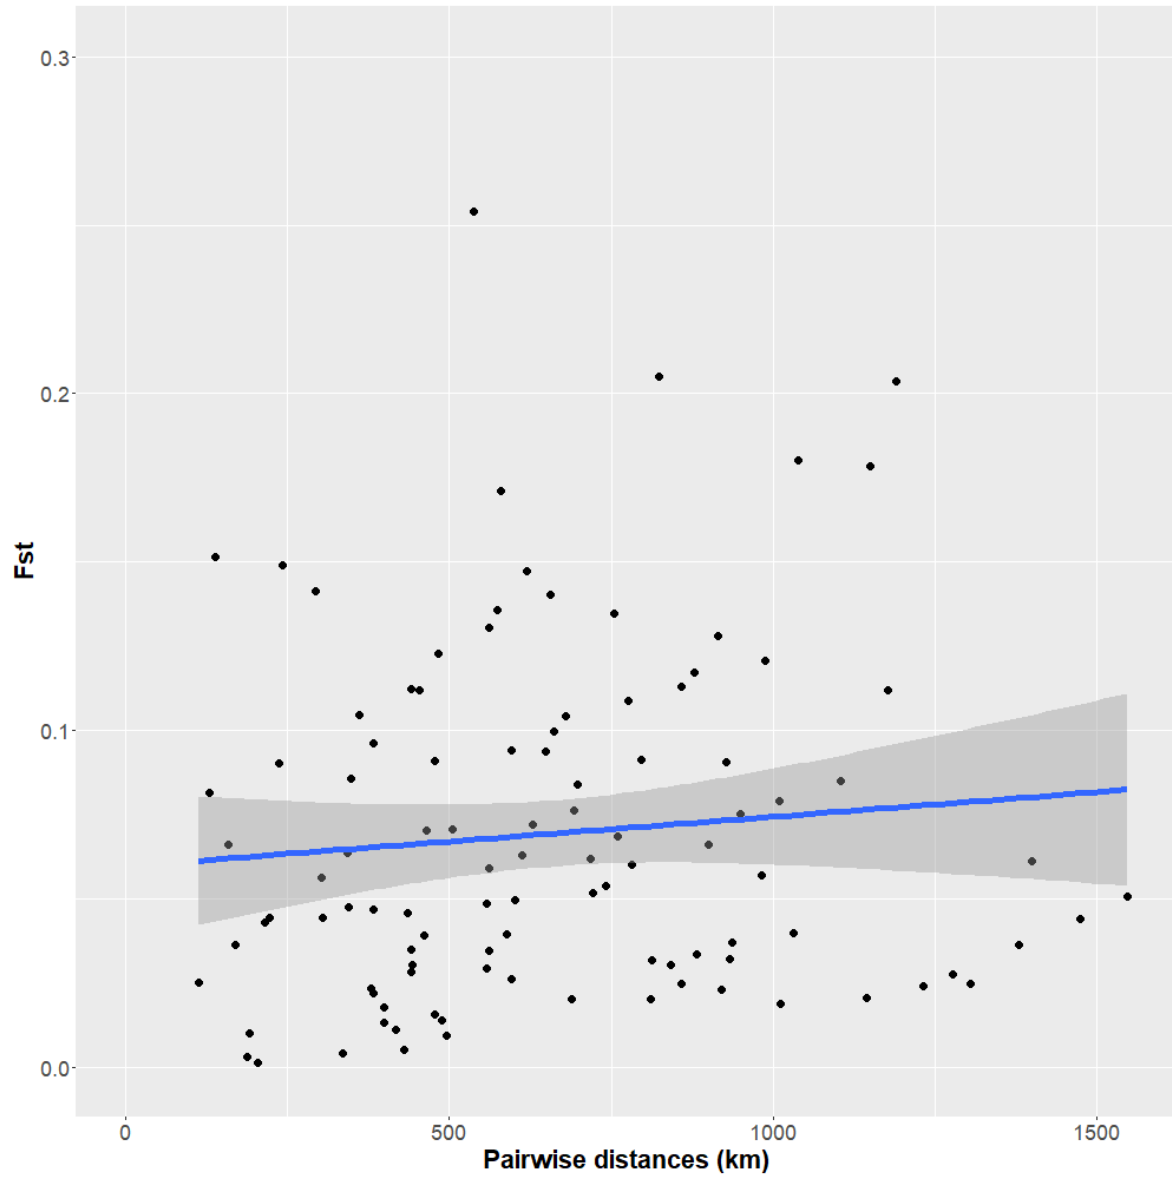

Figure S2. Discriminant Analysis of Principal Components (DACP) for the Iberian Peninsula populations of *Leptoglossus occidentalis*.

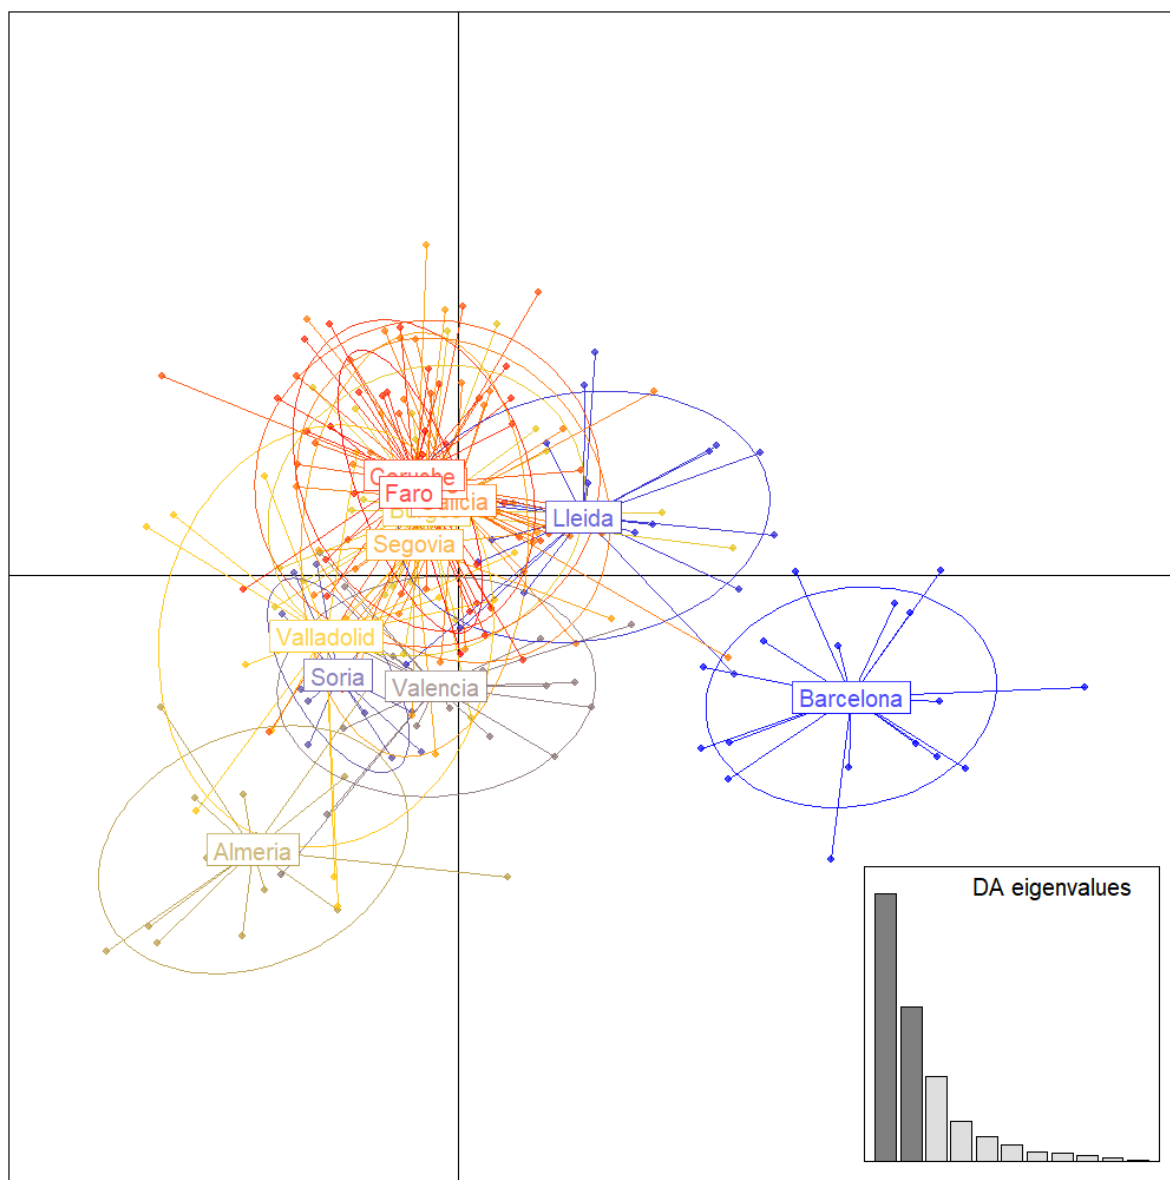

Figure S3. Neighbor-joining tree estimation of Saitou and Nei (1987) for *Leptoglossus occidentalis*.

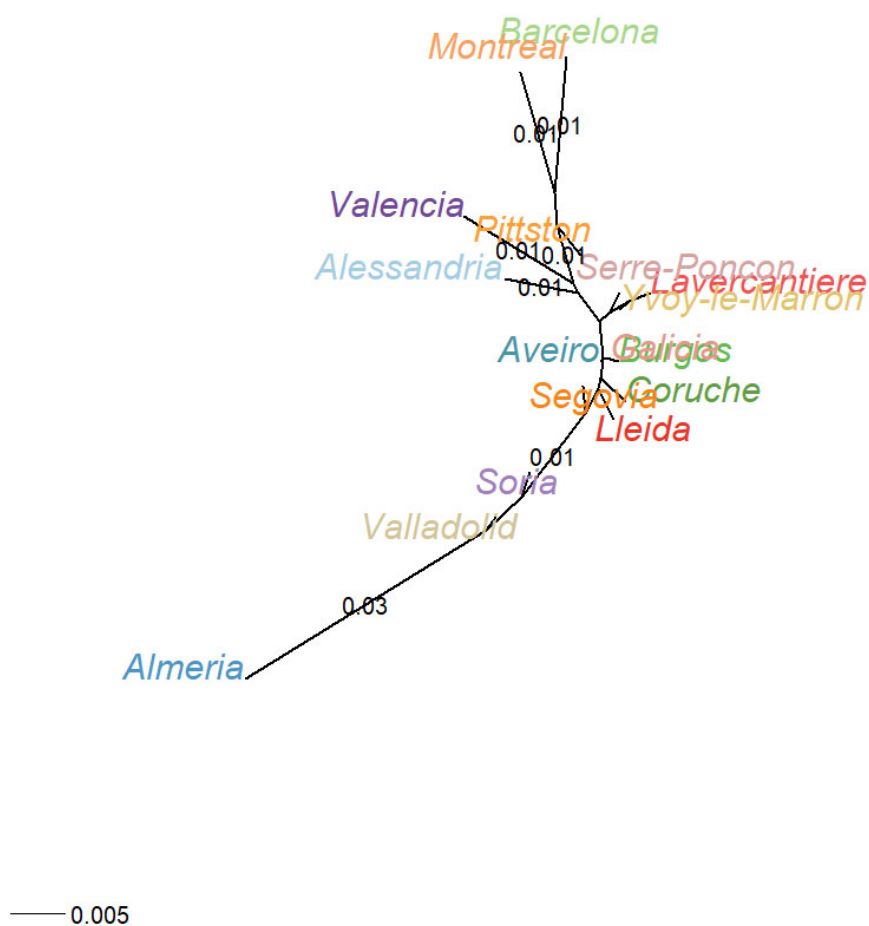

Figure S4. DeltaK plot for the full dataset. DeltaK values were calculated with STRUCTURE Harvester based on the Evanno method.

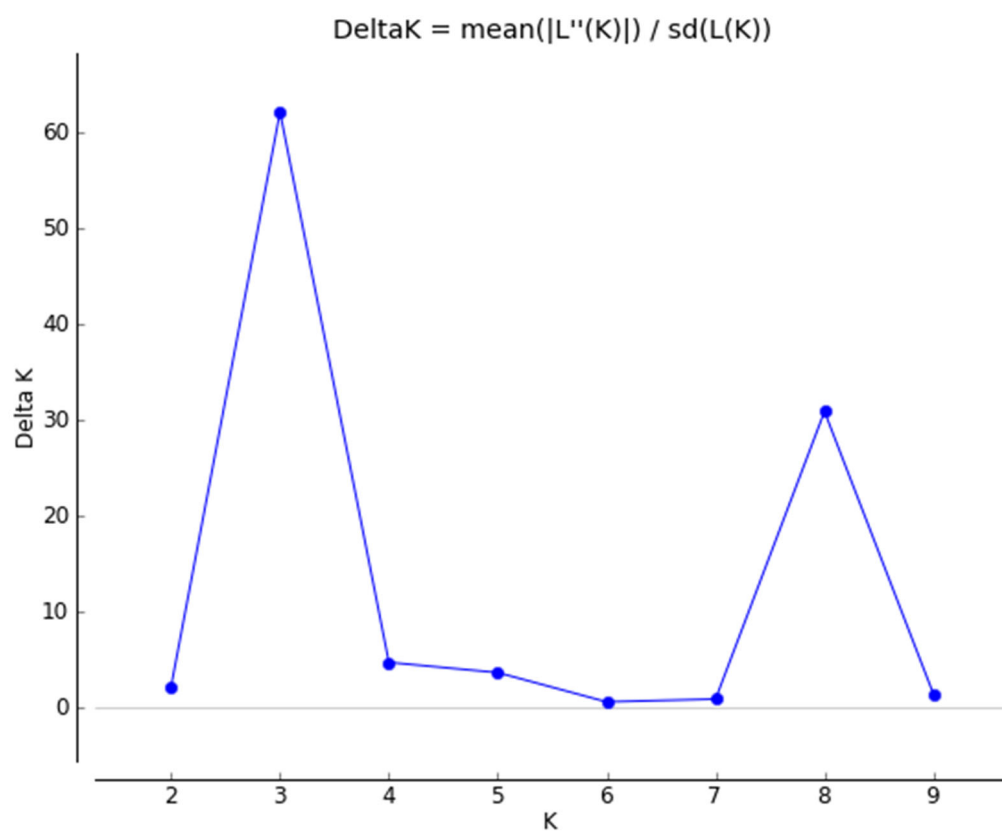

Figure S5. Geographical distribution of the genetic clusters identified using STRUCTURE for *Leptoglossus occidentalis* for (A) K=2, best K determined by the Evanno method, and (B) K3. The populations from North East America (E. America), Italy, France, and Barcelona and Valencia in Spain were incorporated to the dataset from Lesieur et al. (2019).

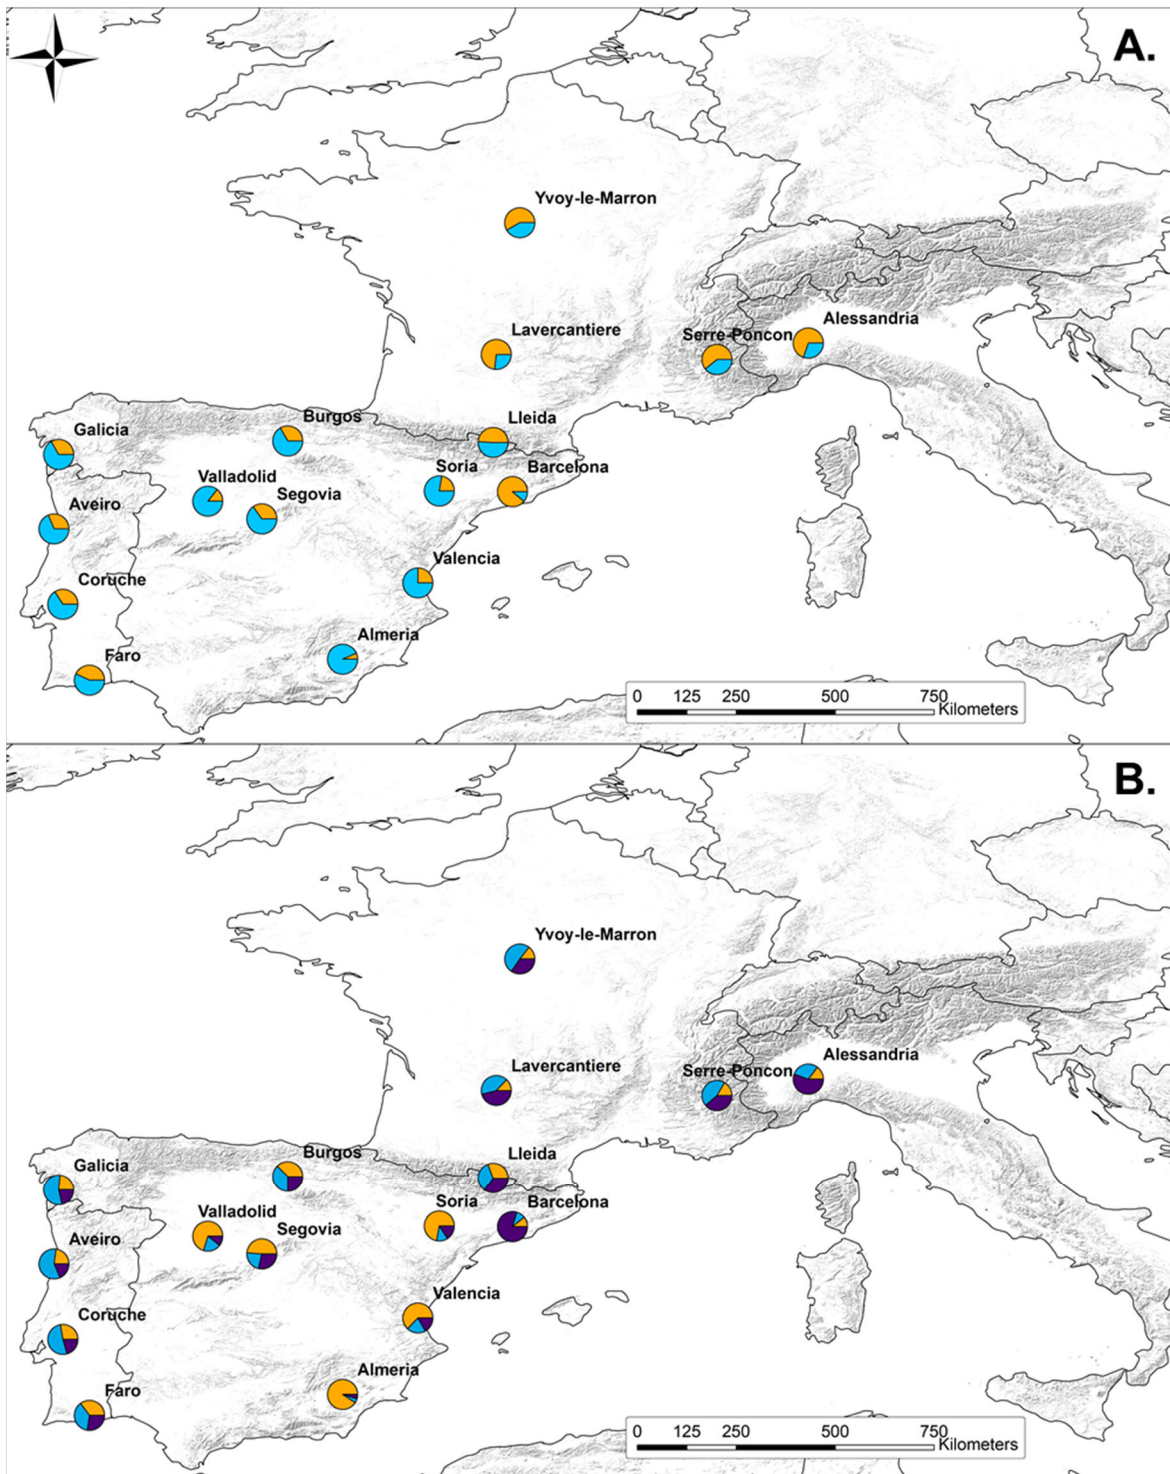

Supplement: s1 [file s1]
